# Supplementary material for: Simplified immunosuppressive and neuroprotective agents based on gracilin A
Source: Springer Nature journal article supplement (doi:10.1038/s41557-019-0230-0), 2019-03-22
Supplement: 41557_2019_230_MOESM29_ESM.mol [file 41557_2019_230_MOESM29_ESM.mol]

nchem.18030573C-comp11.mol
  ChemDraw02041912232D

  5  4  0  0  0  0  0  0  0  0999 V2000
   -0.3572   -0.6187    0.0000 C   0  0  0  0  0  0  0  0  0  0  0  0
    0.3572   -0.2062    0.0000 C   0  0  0  0  0  0  0  0  0  0  0  0
   -1.0717   -0.2062    0.0000 C   0  0  0  0  0  0  0  0  0  0  0  0
    0.3572    0.6187    0.0000 O   0  0  0  0  0  0  0  0  0  0  0  0
    1.0717   -0.6187    0.0000 Cl  0  0  0  0  0  0  0  0  0  0  0  0
  1  2  1  0      
  1  3  2  0      
  2  4  2  0      
  2  5  1  0      
M  END
