# Supplementary material for: Simplified immunosuppressive and neuroprotective agents based on gracilin A
Source: Springer Nature journal article supplement (doi:10.1038/s41557-019-0230-0), 2019-03-22
Supplement: 41557_2019_230_MOESM51_ESM.mol [file 41557_2019_230_MOESM51_ESM.mol]

nchem.18030573C-comp17.mol
  ChemDraw02041912232D

 14 15  0  0  1  0  0  0  0  0999 V2000
    0.4369   -0.4125    0.0000 C   0  0  0  0  0  0  0  0  0  0  0  0
    0.4369    0.4125    0.0000 C   0  0  0  0  0  0  0  0  0  0  0  0
    1.2216   -0.6674    0.0000 C   0  0  0  0  0  0  0  0  0  0  0  0
    1.7065   -0.0000    0.0000 O   0  0  0  0  0  0  0  0  0  0  0  0
    1.2216    0.6674    0.0000 C   0  0  0  0  0  0  0  0  0  0  0  0
    1.4765    1.4521    0.0000 O   0  0  0  0  0  0  0  0  0  0  0  0
   -0.2775    0.8250    0.0000 C   0  0  0  0  0  0  0  0  0  0  0  0
   -0.9920    0.4125    0.0000 C   0  0  0  0  0  0  0  0  0  0  0  0
   -0.9920   -0.4125    0.0000 C   0  0  0  0  0  0  0  0  0  0  0  0
   -0.2775   -0.8250    0.0000 C   0  0  0  0  0  0  0  0  0  0  0  0
   -1.7065   -0.8250    0.0000 O   0  0  0  0  0  0  0  0  0  0  0  0
    0.5232    1.2330    0.0000 H   0  0  0  0  0  0  0  0  0  0  0  0
    0.5232   -1.2330    0.0000 H   0  0  0  0  0  0  0  0  0  0  0  0
    1.4765   -1.4521    0.0000 O   0  0  0  0  0  0  0  0  0  0  0  0
  1  2  1  0      
  1  3  1  0      
  3  4  1  0      
  4  5  1  0      
  5  2  1  0      
  5  6  1  4      
  2  7  1  0      
  7  8  1  0      
  8  9  1  0      
  9 10  1  0      
 10  1  1  0      
  9 11  2  0      
  2 12  1  6      
  1 13  1  6      
  3 14  1  4      
M  END
