# Supplementary material for: Simplified immunosuppressive and neuroprotective agents based on gracilin A
Source: Springer Nature journal article supplement (doi:10.1038/s41557-019-0230-0), 2019-03-22
Supplement: 41557_2019_230_MOESM53_ESM.mol [file 41557_2019_230_MOESM53_ESM.mol]

nchem.18030573C-comp18.mol
  ChemDraw02041912232D

  8  8  0  0  0  0  0  0  0  0999 V2000
   -1.0717    0.0000    0.0000 C   0  0  0  0  0  0  0  0  0  0  0  0
   -1.0717   -0.8250    0.0000 C   0  0  0  0  0  0  0  0  0  0  0  0
   -0.3572   -1.2375    0.0000 C   0  0  0  0  0  0  0  0  0  0  0  0
    0.3572   -0.8250    0.0000 C   0  0  0  0  0  0  0  0  0  0  0  0
    0.3572    0.0000    0.0000 C   0  0  0  0  0  0  0  0  0  0  0  0
   -0.3572    0.4125    0.0000 C   0  0  0  0  0  0  0  0  0  0  0  0
   -0.3572    1.2375    0.0000 Cl  0  0  0  0  0  0  0  0  0  0  0  0
    1.0717   -1.2375    0.0000 C   0  0  0  0  0  0  0  0  0  0  0  0
  4  8  1  0      
  1  2  1  0      
  2  3  1  0      
  3  4  1  0      
  4  5  2  0      
  5  6  1  0      
  6  1  1  0      
  6  7  1  4      
M  STY  1   1 SUP
M  SLB  1   1   1
M  SAL   1  1   8
M  SBL   1  1   1
M  SMT   1 Me
M  SBV   1   1   -0.7145    0.4125
M  END
